# Supplementary material for: Rice Cultivar Renewal Reduces Methane Emissions by Improving Root Traits and Optimizing Photosynthetic Carbon Allocation
Source: MDPI journal article supplement (doi:10.3390/agriculture12122134), 2022-12-12
Supplement: s1 [file s1]

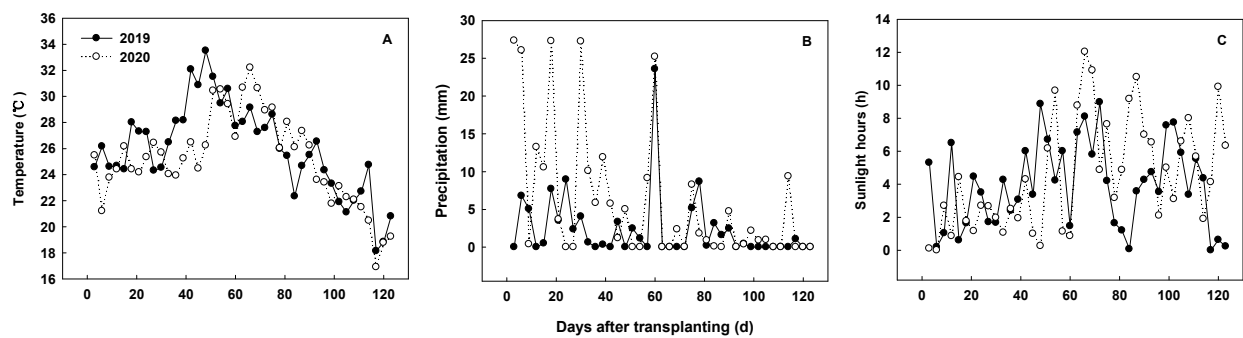

**Figure S1.** Air temperature (A), precipitation (B), and sunlight hours (C) during the growing seasons of rice at the experiment site of Yangzhou, Southeast China in 2019 and 2020.

**Table S1.** Analysis-of-variance of F-values of rice growth duration, grain yield, total CH<sub>4</sub> emissions during the whole growth duration (Total CH<sub>4</sub>), cumulative CH<sub>4</sub> emissions in panicle differentiation stage (CH<sub>4</sub> in PD), rice root biomass (RB), root oxidation activity (ROA), root radial oxygen loss (ROL) and total organic carbon content in root exudate (ETOC) between/among years and cultivars in experiment 1.

|                 | df | Growth duration | Yield | Total CH <sub>4</sub> | CH <sub>4</sub> in PD | RB     | ROA    | ROL    | ETOC   |
|-----------------|----|-----------------|-------|-----------------------|-----------------------|--------|--------|--------|--------|
| Cultivar        | 11 | 4.2**           | 3.5** | 532.7**               | 311.6**               | 95.6** | 43.8** | 16.9** | 10.2** |
| Year            | 1  | ns              | ns    | 224.1**               | ns                    | ns     | ns     | 3.5*   | ns     |
| Cultivar × Year | 11 | ns              | ns    | ns                    | ns                    | ns     | ns     | ns     | ns     |

\* and \*\* F-values significant at the 0.05 and 0.01 probability levels, respectively. Ns, non-significant at the 0.05 probability level.

**Table S2.** Changes in root morphological traits during japonica rice cultivar renewal.

| Cultivar type | Cultivar       | Root length ( $\times 10^3$ m m <sup>-2</sup> ) |                | Root number ( $\times 10^3$ m <sup>-2</sup> ) |               | Specific root length (m g <sup>-1</sup> DW) |               |
|---------------|----------------|-------------------------------------------------|----------------|-----------------------------------------------|---------------|---------------------------------------------|---------------|
|               |                | Booting                                         | Heading        | Booting                                       | Heading       | Booting                                     | Heading       |
| 1950's        | Huangkezao     | 3.35                                            | 3.58           | 3.12                                          | 3.24          | 73.6                                        | 72.1          |
|               | Guihuaqiu      | 3.51                                            | 3.70           | 3.2                                           | 3.44          | 68.0                                        | 64.9          |
|               | <b>Average</b> | <b>3.43 d</b>                                   | <b>3.64 d</b>  | <b>3.16 d</b>                                 | <b>3.34 d</b> | <b>70.6 a</b>                               | <b>68.3 a</b> |
| 1960's        | Jinnanfeng     | 3.48                                            | 3.59           | 3.28                                          | 3.45          | 66.4                                        | 62.2          |
|               | Guihuahuang    | 3.66                                            | 3.79           | 3.2                                           | 3.33          | 58.2                                        | 54.3          |
|               | <b>Average</b> | <b>3.57 cd</b>                                  | <b>3.69 d</b>  | <b>3.24 d</b>                                 | <b>3.39 d</b> | <b>61.9 b</b>                               | <b>57.9 b</b> |
| 1970's        | Liming         | 3.59                                            | 3.81           | 3.34                                          | 3.51          | 54.0                                        | 52.6          |
|               | Xudao2         | 3.77                                            | 3.95           | 3.5                                           | 3.63          | 62.2                                        | 58.1          |
|               | <b>Average</b> | <b>3.68 c</b>                                   | <b>3.88 c</b>  | <b>3.42 c</b>                                 | <b>3.57 c</b> | <b>57.9 c</b>                               | <b>55.2 b</b> |
| 1980's        | Yanjing2       | 3.74                                            | 3.82           | 3.48                                          | 3.59          | 33.8                                        | 32.0          |
|               | Sidao8         | 4.01                                            | 4.14           | 3.58                                          | 3.77          | 35.0                                        | 34.1          |
|               | <b>Average</b> | <b>3.88 bc</b>                                  | <b>3.98 bc</b> | <b>3.53 bc</b>                                | <b>3.68 c</b> | <b>34.4 d</b>                               | <b>33.1 c</b> |
| 1990's        | Zhendao88      | 4.08                                            | 4.21           | 3.76                                          | 3.95          | 34.5                                        | 33.0          |
|               | Huaidao5       | 3.9                                             | 4.03           | 3.62                                          | 3.79          | 34.1                                        | 32.5          |
|               | <b>Average</b> | <b>3.99 b</b>                                   | <b>4.12 b</b>  | <b>3.69 b</b>                                 | <b>3.87 b</b> | <b>34.3 d</b>                               | <b>32.8 c</b> |
| 2000's        | Huaidao9       | 4.2                                             | 4.31           | 3.98                                          | 4.20          | 30.7                                        | 29.0          |
|               | Lianjing7      | 4.02                                            | 4.15           | 3.84                                          | 4.04          | 27.2                                        | 26.2          |
|               | <b>Average</b> | <b>4.11 ab</b>                                  | <b>4.23 ab</b> | <b>3.91 a</b>                                 | <b>4.12 a</b> | <b>28.9 e</b>                               | <b>27.5 d</b> |
| 2010's        | Wuyunjing27    | 4.15                                            | 4.36           | 4.13                                          | 4.28          | 28.1                                        | 27.4          |
|               | Nanjing9108    | 4.21                                            | 4.32           | 3.97                                          | 4.14          | 28.1                                        | 26.7          |
|               | <b>Average</b> | <b>4.18 a</b>                                   | <b>4.34 a</b>  | <b>4.05 a</b>                                 | <b>4.21 a</b> | <b>28.1 e</b>                               | <b>27.0 d</b> |

Different letters indicate statistical significance at the  $P < 0.05$  probability level.

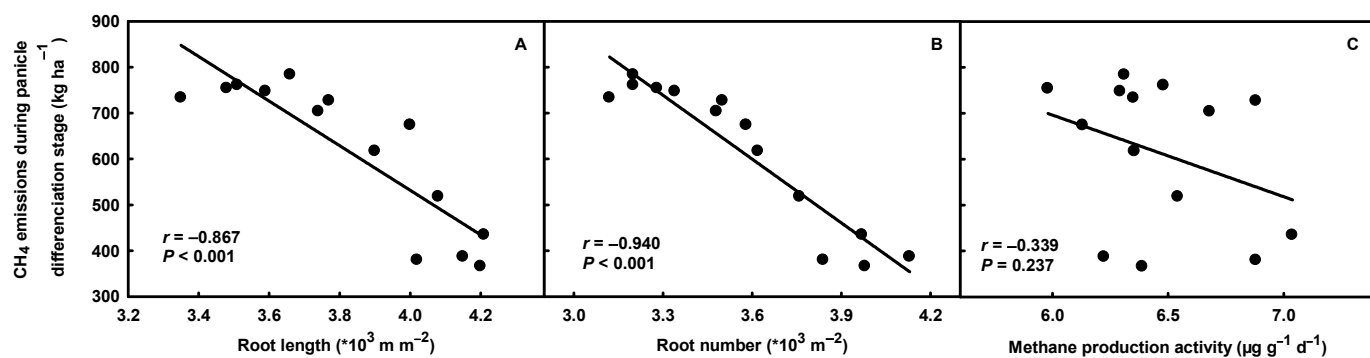

**Figure S2.** Relationships between cumulative CH<sub>4</sub> emissions in panicle differentiation and root length (A), root number (B), and methane production activity in rhizosphere soil (C).

**Table S3.** Effect of nitrogen application at panicle differentiation stage on root biomass, root oxidation activity, and root oxygen loss

| Cultivar | N treatment | Root biomass<br>(g m <sup>-2</sup> ) | Root oxidation activity<br>(μg α-NA g <sup>-1</sup> DW h <sup>-1</sup> ) | Root oxygen loss<br>(mmol O <sub>2</sub> plant <sup>-1</sup> h <sup>-1</sup> ) |
|----------|-------------|--------------------------------------|--------------------------------------------------------------------------|--------------------------------------------------------------------------------|
| NJ9108   | 0N          | 127.0 b                              | 432.0 b                                                                  | 543.5 b                                                                        |
|          | NN          | 150.8 a                              | 513.5 a                                                                  | 617.8 a                                                                        |
| WYJ27    | 0N          | 136.9 b                              | 426.7 b                                                                  | 521.4 b                                                                        |
|          | NN          | 166.4 a                              | 531.8 a                                                                  | 593.4 a                                                                        |

Different letters indicate statistical significance at the  $P < 0.05$  probability level within the same rice cultivar.
